# Supplementary material for: A multidisciplinary decision support tool for evaluating multiple biorefinery conversion technologies and supply chain performance
Source: Springer Nature journal article supplement (doi:10.1007/s10098-013-0703-6), 2013-12-10
Supplement: MOESM1 [file 5323796]

**Appendix 1**: Detailed description of equation 2.

**Decision Variables**:

*Pj*: the selection of a biorefinery at location (j)

*X­­fijm*: the amount of feedstock (f) to be transported from biomass feedstock location (i) to biorefinery location (j) in month (m)

*Ypjkm*: the amount of product (p) to be transported from biorefinery location (j) to market distribution location (k) in month (m)

**Subscript indices**:

*F*= Number of biomass feedstock

*P* = Number of product

*I*= Number of biomass location

*J* = Number of plant location

*K*= Number of product location

*M*= Month

**Parameters**:

*Ppm*= products created in that month

*PPp* = price of the product

*BPf* = price of biomass

*BCm* = monthly biomass purchasing cost

*BC’m* = monthly biomass inventory cost

*BC’’m* = monthly biomass transportation cost

*BC’’’m* = monthly cost of diesel to transport the biomass

*OCm* = monthly operating cost

*PCm* = monthly product transportation cost

*PS* = amount of products created

*PC’m* = monthly product transportation diesel cost

*ELECm* = monthly biorefinery electricity cost

*COOLm* = monthly biorefinery cooling cost

*HEATm* = monthly biorefinery heating cost

*LCm* = monthly labor cost

*R* = biomass land rent cost

*T =* number of trucks

*SCm* = monthly supervisor cost

*MCm* = monthly maintenance cost

*MC’m* = monthly maintenance cost conversion

*OVCm* = monthly overhead cost

*ACCm* = monthly annualized capital cost

*DP* = diesel price

*TM* = truck mass

*TM’* = biomass truck capacity

*TM’’*= product truck capacity

*BTC* = distance dependent cost

*BTC’* = time dependent cost of transportation

*PTC* = product distance dependent cost

*PTC’* = product time dependent cost

*k* = energy consumption conversion factor

*c* = conversion factor

*ρ* = density

*s* = truck speed

*d* = distance
