# Supplementary material for: A multidisciplinary decision support tool for evaluating multiple biorefinery conversion technologies and supply chain performance
Source: Springer Nature journal article supplement (doi:10.1007/s10098-013-0703-6), 2013-12-10
Supplement: MOESM2 [file 5323796]

**Appendix 2:**

Feed Proximate Analysis Data:

|  | Fixed Carbon | Volatile Matter | Ash | Moisture |
| --- | --- | --- | --- | --- |
| Forest Residue | 6.96 | 42.10 | 2.03 | 48.91 |
| Chicken litter | 1.70 | 38.90 | 16.40 | 43.00 |
| Corn Stover | 17.70 | 52.80 | 4.50 | 25.00 |

Feed Ultimate Analysis Data

|  | C | H | O | N | S | Cl | Ash |
| --- | --- | --- | --- | --- | --- | --- | --- |
| Forest Residue | 50.31 | 4.59 | 39.99 | 1.03 | 0.11 | - | 3.97 |
| Chicken Litter | 28.17 | 3.64 | 34.43 | 3.78 | 0.55 | 0.63 | 28.80 |
| Corn Stover | 47.28 | 5.06 | 40.63 | 0.80 | 0.22 | - | 6.10 |
